# Supplementary material
Source: PubMed Central journal article supplement (PMC7417164)

# THE LANCET

## Global Health

### Supplementary appendix 3

This appendix formed part of the original submission and has been peer reviewed. We post it as supplied by the authors.

Supplement to: KC A, Gurung R, Kinney MV, et al. Effect of the COVID-19 pandemic response on intrapartum care, stillbirth, and neonatal mortality outcomes in Nepal: a prospective observational study. *Lancet Glob Health* 2020; published online Aug 10. [http://dx.doi.org/10.1016/S2214-109X\(20\)30345-4](http://dx.doi.org/10.1016/S2214-109X(20)30345-4).

## **Supplementary material**

### **Effect of COVID-19 pandemic response on intrapartum care and stillbirth and neonatal mortality outcomes in Nepal: prospective cohort observational study**

Ashish KC PhD, Rejina Gurung MSc, Mary V. Kinney MSc, Avinash K Sunny MD, Md Moinuddin PhD, Omkar Basnet BSc, Prajwal Paudel MD, Pratiksha Bhattarai MA, Kalpana Subedi MD, Mahendra Prasad Shrestha MPH, Joy E. Lawn FMedSci, Mats Målqvist PhD

Contents

|                                                                                                                                                                                             |           |
|---------------------------------------------------------------------------------------------------------------------------------------------------------------------------------------------|-----------|
| <b>Supplementary table 1. Search strategy .....</b>                                                                                                                                         | <b>3</b>  |
| <b>Supplementary table 2. Number of doctors and nurse working in labour-delivery room and annual births.....</b>                                                                            | <b>3</b>  |
| <b>Supplementary table 3. Weekly institutional birth, weekly rate of change, preterm birth, caesarean birth, low birth weight, institutional stillbirth and neonatal mortality.....</b>     | <b>4</b>  |
| <b>Supplementary table 4. Change in number of births before and during LD using the linear regression.....</b>                                                                              | <b>5</b>  |
| <b>Supplementary Table 5. Participants pre-and during COVID-19 lockdown in terms of demographic, obstetric and neonatal characteristics (N-20,354).....</b>                                 | <b>6</b>  |
| <b>Supplementary table 6. Poisson regression on the change in the risk before COVID-19 LD and during LD .....</b>                                                                           | <b>7</b>  |
| <b>Supplementary table 7. Total number of observations and health worker’s performance on a weekly basis .....</b>                                                                          | <b>8</b>  |
| <b>Supplementary Table 8. Weekly birth rate in 9 hospitals January-May 2019 and January-May 2020 .....</b>                                                                                  | <b>9</b>  |
| <b>Supplementary Table 9. The hospital-wise random intercept for caesarean birth, preterm birth, institutional stillbirth and neonatal mortality .....</b>                                  | <b>10</b> |
| <b>Supplementary figure 1. Map of Nepal and location of hospitals.....</b>                                                                                                                  | <b>11</b> |
| <b>Supplementary figure 2. Participant flow figure .....</b>                                                                                                                                | <b>12</b> |
| <b>Supplementary figure 3. Weekly change in preterm birth rate before and during COVID-19 LD .....</b>                                                                                      | <b>13</b> |
| <b>Supplementary 4. Weekly change in the institutional stillbirth rate before and during COVID-19 LD.....</b>                                                                               | <b>14</b> |
| <b>Supplementary figure 5. Weekly change in the institutional neonatal mortality rate before and after COVID-19 LD .....</b>                                                                | <b>15</b> |
| <b>Supplementary figure 6a. Health worker’s infection prevention practice, preparation of equipment during childbirth, and changes after Nepal national lockdown (red dotted line).....</b> | <b>16</b> |
| <b>Supplementary figure 6b. Health worker’s infection prevention practice, hand washing as per WHO standard, and changes after Nepal national lockdown (red dotted line) .....</b>          | <b>17</b> |
| <b>Supplementary figure 6c. Health worker’s infection prevention practice, use of gown and gloves during childbirth, and changes after Nepal national lockdown (red dotted line).....</b>   | <b>18</b> |

**Supplementary table 1. Search strategy**

| Search number | Query                                                                                                | Sort By | Filters             | Search Details                                                                                                                                                                                                                                                                                                                                                                                                                                                                                                                                                                                                                                                                                                                                                                                                                                                                                                                                                                                                                                                                                                                                                                                                                                                                                                                                                                                           | Results | Time         | Date       |
|---------------|------------------------------------------------------------------------------------------------------|---------|---------------------|----------------------------------------------------------------------------------------------------------------------------------------------------------------------------------------------------------------------------------------------------------------------------------------------------------------------------------------------------------------------------------------------------------------------------------------------------------------------------------------------------------------------------------------------------------------------------------------------------------------------------------------------------------------------------------------------------------------------------------------------------------------------------------------------------------------------------------------------------------------------------------------------------------------------------------------------------------------------------------------------------------------------------------------------------------------------------------------------------------------------------------------------------------------------------------------------------------------------------------------------------------------------------------------------------------------------------------------------------------------------------------------------------------|---------|--------------|------------|
| 2             | ((COVID-19) AND (utilization of health services)) AND (quality of intrapartum care)) AND (mortality) |         | in the last 5 years | (( ("COVID-19"[All Fields] OR "COVID-2019"[All Fields] OR "severe acute respiratory syndrome coronavirus 2"[Supplementary Concept] OR "severe acute respiratory syndrome coronavirus 2"[All Fields] OR "2019-nCoV"[All Fields] OR "SARS-CoV-2"[All Fields] OR "2019nCoV"[All Fields] OR ("Wuhan"[All Fields] AND ("coronavirus"[MeSH Terms] OR "coronavirus"[All Fields])) AND (2019/12[PDAT] OR 2020[PDAT])) ) AND ( "statistics and numerical data"[Subheading] OR ("statistics"[All Fields] AND "numerical"[All Fields] AND "data"[All Fields]) OR "statistics and numerical data"[All Fields] OR "utilization"[All Fields] OR "utilisation"[All Fields] OR "utilisations"[All Fields] OR "utilise"[All Fields] OR "utilised"[All Fields] OR "utilises"[All Fields] OR "utilising"[All Fields] OR "utilities"[All Fields] OR "utility"[All Fields] OR "utilizations"[All Fields] OR "utilize"[All Fields] OR "utilized"[All Fields] OR "utilizer"[All Fields] OR "utilizers"[All Fields] OR "utilizes"[All Fields] OR "utilizing"[All Fields] of "health services"[MeSH Terms] OR ("health"[All Fields] AND "services"[All Fields]) OR "health services"[All Fields] ) ) AND ( "qualities"[All Fields] OR "quality"[All Fields] OR "quality's"[All Fields] of intrapartum care ) ) AND ( "mortality"[MeSH Terms] OR "mortality"[All Fields] OR "mortalities"[All Fields] OR "mortality"[Subheading] ) | 0       | 13:42:02 CST | 05.07.2020 |

**Supplementary table 2. Number of doctors and nurse working in labour-delivery room and annual births**

| Province              | Hospital                           | Nurses | Doctors | Number of annual birth |
|-----------------------|------------------------------------|--------|---------|------------------------|
| Province 1            | Koshi Provincial Hospital          | 16     | 14      | 5,464                  |
| Province 2            | Janakpur Provincial Hospital       | 13     | 10      | 14,300                 |
| Bagmati Pradesh       | Bharatpur Hospital                 | 23     | 10      | 11,006                 |
| Gandaki Pradesh       | Pokhara Academy of Health Sciences | 19     | 14      | 8,610                  |
| Province 5            | Lumbini Provincial Hospital        | 14     | 12      | 8,649                  |
|                       | Bheri Hospital                     | 12     | 5       | 4,132                  |
| Karnali Pradesh       | Surkhet Provincial Hospital        | 18     | 6       | 3,847                  |
| Sudurpashchim Pradesh | Seti Provincial Hospital           | 11     | 5       | 6,277                  |
|                       | Dadeldhura Hospital                | 9      | 4       | 3,112                  |

**Supplementary table 3. Weekly institutional birth, weekly rate of change, preterm birth, caesarean birth, low birth weight, institutional stillbirth and neonatal mortality**

| Week | Day     | Period          | total births (N) | Weekly rate of change (%) | Total change between week 1 and week 21 (%) | Preterm (<37 weeks) (N) | Caesarean birth (N) | Low birth weight babies (<2500 gram) (N) | Institutional stillbirth (N) | Institutional neonatal mortality (N) |
|------|---------|-----------------|------------------|---------------------------|---------------------------------------------|-------------------------|---------------------|------------------------------------------|------------------------------|--------------------------------------|
| 1    | 0-6     | Pre-COVID-19 LD | 1330             |                           |                                             | 226                     | 129                 | 152                                      | 16                           | 2                                    |
| 2    | 7-13    | Pre-COVID-19 LD | 1187             | 10.8%                     |                                             | 208                     | 126                 | 115                                      | 19                           | 0                                    |
| 3    | 14-20   | Pre-COVID-19 LD | 1134             | 4.5%                      |                                             | 192                     | 123                 | 120                                      | 24                           | 1                                    |
| 4    | 21-27   | Pre-COVID-19 LD | 1221             | -7.7%                     |                                             | 216                     | 107                 | 161                                      | 21                           | 3                                    |
| 5    | 28-34   | Pre-COVID-19 LD | 1181             | 3.3%                      |                                             | 185                     | 91                  | 127                                      | 14                           | 2                                    |
| 6    | 35-41   | Pre-COVID-19 LD | 1061             | 10.2%                     |                                             | 172                     | 119                 | 99                                       | 9                            | 0                                    |
| 7    | 42-48   | Pre-COVID-19 LD | 1179             | -11.1%                    |                                             | 190                     | 124                 | 108                                      | 13                           | 2                                    |
| 8    | 49-55   | Pre-COVID-19 LD | 1027             | 12.9%                     |                                             | 155                     | 113                 | 98                                       | 15                           | 1                                    |
| 9    | 56-62   | Pre-COVID-19 LD | 1145             | -11.5%                    |                                             | 169                     | 129                 | 109                                      | 20                           | 2                                    |
| 10   | 63-69   | Pre-COVID-19 LD | 972              | 15.1%                     |                                             | 166                     | 84                  | 128                                      | 8                            | 3                                    |
| 11   | 70-76   | Pre-COVID-19 LD | 1176             | -21.0%                    |                                             | 146                     | 108                 | 133                                      | 16                           | 1                                    |
| 12.5 | 77-83   | Pre-COVID-19 LD | 576              | 51.0%                     |                                             | 91                      | 53                  | 78                                       | 4                            | 1                                    |
| 12.5 | 84-90   | COVID-19 LD     | 420              | 27.1%                     |                                             | 49                      | 38                  | 39                                       | 4                            | 1                                    |
| 13   | 91-97   | COVID-19 LD     | 673              | -60.2%                    |                                             | 70                      | 47                  | 64                                       | 12                           | 0                                    |
| 14   | 98-104  | COVID-19 LD     | 806              | -19.8%                    |                                             | 89                      | 54                  | 93                                       | 19                           | 3                                    |
| 15   | 105-111 | COVID-19 LD     | 700              | 13.2%                     |                                             | 95                      | 59                  | 79                                       | 23                           | 0                                    |
| 16   | 112-118 | COVID-19 LD     | 670              | 4.3%                      |                                             | 64                      | 61                  | 64                                       | 15                           | 2                                    |
| 17   | 119-125 | COVID-19 LD     | 789              | -17.8%                    |                                             | 86                      | 81                  | 77                                       | 14                           | 3                                    |
| 18   | 126-132 | COVID-19 LD     | 789              | 0.0%                      |                                             | 114                     | 67                  | 106                                      | 16                           | 6                                    |
| 19   | 133-139 | COVID-19 LD     | 732              | 7.2%                      |                                             | 154                     | 62                  | 63                                       | 13                           | 4                                    |
| 20   | 140-146 | COVID-19 LD     | 685              | 6.4%                      |                                             | 154                     | 56                  | 69                                       | 14                           | 2                                    |
| 21   | 147-153 | COVID-19 LD     | 633              | 7.6%                      | -52.4%                                      | 137                     | 64                  | 86                                       | 15                           | 2                                    |

**Supplementary table 4. Change in number of births before and during LD using the linear regression**

|                                                                                   | $\beta$ | SE   | P-value |
|-----------------------------------------------------------------------------------|---------|------|---------|
| <b>Weekly number of birth at beginning of observation period</b>                  | 1262.1  | 66.1 | 0.000   |
| <b>Difference in average number of births between pre and during COVID period</b> | -197.7  | 92.3 | 0.0462  |
| <b>Average weekly change in number of births in pre-COVID period</b>              | -19.7   | 9.0  | 0.0419  |
| <b>Average weekly change in number of births during COVID-19 LD</b>               | -9.1    | 14.9 | 0.5492  |

**Supplementary Table 5. Participants pre-and during COVID-19 lockdown in terms of demographic, obstetric and neonatal characteristics (N-20,354)**

|                                                             | Pre-COVID-19 LD |                   | COVID-19 LD |                   | p-value |
|-------------------------------------------------------------|-----------------|-------------------|-------------|-------------------|---------|
|                                                             | n-13,189        | % (95% CI)        | n-7165      | % (95% CI)        |         |
| <b>Ethnicity</b>                                            |                 |                   |             |                   |         |
| <b>Dalit (n-2610)</b>                                       | 1652            | 12.5% (12.0-13.1) | 958         | 13.4% (12.6-14.2) | 0.087   |
| <b>Janajati (n-6057)</b>                                    | 3920            | 29.7% (28.9-30.5) | 2137        | 29.8% (28.8-30.9) | 0.885   |
| <b>Madhesi (n-4068)</b>                                     | 2840            | 21.5% (20.8-22.2) | 1228        | 17.1% (16.3-18.0) | <0.001  |
| <b>Muslim (n-889)</b>                                       | 588             | 4.5% (4.1-4.8)    | 301         | 4.2% (3.8-4.7)    | 0.409   |
| <b>Brahmin, Chhetri-Hill (n-6484)</b>                       | 4055            | 30.7% (30.0-31.5) | 2429        | 33.9% (32.8-35.0) | <0.001  |
| <b>Brahmin, Tarai (n-246)</b>                               | 134             | 1.0% (0.9-1.2)    | 112         | 1.6% (1.3-1.9)    | 0.001   |
|                                                             |                 |                   |             |                   |         |
| <b>Age (Mean±SD)</b>                                        |                 | 24.1±4.4          |             | 24.3±4.5          |         |
| <b>Age category</b>                                         |                 |                   |             |                   |         |
| <b>18 years or less (n-1132)</b>                            | 766             | 5.8% (5.4-6.2)    | 366         | 5.1% (4.6-5.6)    | 0.038   |
| <b>19-24 years (n-10,588)</b>                               | 6946            | 52.7% (51.8-53.5) | 3642        | 50.8% (49.7-52.0) | 0.013   |
| <b>25-29 years (n-5,863)</b>                                | 3715            | 28.2% (27.4-28.9) | 2148        | 30.0% (28.9-31.1) | 0.006   |
| <b>30-34 years (n-2,158)</b>                                | 1373            | 10.4% (9.9-10.9)  | 785         | 11.0% (10.3-11.7) | 0.233   |
| <b>35 years or above (n-613)</b>                            | 389             | 2.9% (2.7-3.3)    | 224         | 3.1% (2.7-3.6)    |         |
| <b>Parity</b>                                               |                 |                   |             |                   |         |
| <b>No previous birth (n-7,237)</b>                          | 4624            | 35.1% (34.3-35.9) | 2613        | 36.6% (35.4-37.7) | 0.041   |
| <b>One previous birth (n-7951)</b>                          | 5236            | 39.8% (38.9-40.6) | 2715        | 38.0% (36.9-39.1) | 0.014   |
| <b>Two or more previous birth (n-5130)</b>                  | 3310            | 25.1% (24.4-25.9) | 1820        | 25.5% (24.3-26.7) | 0.612   |
|                                                             |                 |                   |             |                   |         |
| <b>Complication during admission (n-1,471)</b>              | 884             | 6.7% (6.3-7.1)    | 587         | 8.2% (7.6-8.9)    | 0.01    |
| <b>Induction of labour (n-4,540)</b>                        | 2258            | 17.1% (16.5-17.8) | 2282        | 31.8% (30.8-32.9) | <0.001  |
| <b>Augmentation of labour (n-7,615)</b>                     | 5288            | 40.1% (39.3-40.9) | 2327        | 32.5% (31.4-33.6) | <0.001  |
| <b>Mode of delivery</b>                                     |                 |                   |             |                   |         |
| <b>Spontaneous vaginal birth (n-14,614)</b>                 | 9581            | 72.6% (71.9-73.4) | 5060        | 70.6% (69.6-71.7) | 0.002   |
| <b>Assisted vaginal birth (n-600)</b>                       | 374             | 2.8% (2.6-3.1)    | 226         | 3.2% (2.8-3.6)    | 0.224   |
| <b>Caesarean birth (n-5,113)</b>                            | 3234            | 24.5% (23.8-25.3) | 1879        | 26.2% (25.2-27.3) | 0.007   |
| <b>Birth weight in gram (Mean±SD)</b>                       |                 | 2942.4±492.4      |             | 2953.0±518.5      |         |
| <b>Low birth weight* (Birth weight less than 2500 gram)</b> |                 |                   |             |                   |         |
| <b>No (n-17,708)</b>                                        | 11316           | 88.9% (88.3-89.4) | 6392        | 89.5% (88.6-90.3) |         |
| <b>Yes (n-2202)</b>                                         | 1429            | 11.1% (10.6-11.7) | 773         | 10.5% (9.7-11.4)  | 0.371   |
| <b>Gestational age in weeks (Mean±SD)</b>                   |                 | 38.6±1.7          |             | 38.6±2.4          |         |
| <b>Preterm* (Gestational age less than 37 weeks)</b>        |                 |                   |             |                   |         |
| <b>No (n-16,443)</b>                                        | 10621           | 83.3% (82.6-83.9) | 5822        | 80.0% (78.9-81.1) |         |
| <b>Yes (n-3,467)</b>                                        | 2125            | 16.7% (16.1-17.4) | 1342        | 20.0% (18.9-21.1) | <0.001  |
| <b>Sex of baby</b>                                          |                 |                   |             |                   |         |
| <b>Boy (n-11,244)</b>                                       | 7362            | 55.6% (54.7-56.4) | 3882        | 54.2% (52.9-55.6) | .055    |
| <b>Girl (n-9,101)</b>                                       | 5820            | 44.4% (43.5-45.3) | 3281        | 45.7% (44.4-47.1) |         |
| <b>Ambiguous (n-9)</b>                                      | 7               | 0.1% (0.03-0.1)   | 2           | 0.04% (0.01-0.1)  |         |

\* missing value-444 red signifies significant change, negative health impact

**Supplementary table 6. Poisson regression on the change in the risk before COVID-19 LD and during LD**

|                                                                         | Induction of labour |         | Augmentation of labour |         | Caesarean birth   |         | Low birth weight |         |
|-------------------------------------------------------------------------|---------------------|---------|------------------------|---------|-------------------|---------|------------------|---------|
|                                                                         | $\beta$ (95% CI)    | p-value | $\beta$ (95% CI)       | p-value | $\beta$ (95% CI)  | p-value | $\beta$ (95% CI) | p-value |
| Risk at the beginning of the observation period                         | 0.16 (0.14-0.17)    | <0.001  | 0.41 (0.39-0.43)       | <0.001  | 0.10 (0.090-0.11) | <0.001  | 0.11 (0.95-0.12) | <0.001  |
| Risk ratio in post COVID period compared to pre COVID period            | 0.95 (0.84-1.08)    | 0.405   | 0.83 (0.75-0.91)       | <0.001  | 0.80 (0.65-0.98)  | 0.0302  | 0.92 (0.77-1.10) | 0.373   |
| Risk ratio for a between any consecutive weeks during pre COVID period  | 1.02 (1.00-1.03)    | 0.011   | 1.00 (0.99-1.00)       | 0.27    | 1.00 (0.98-1.01)  | 0.648   | 1.00 (0.99-1.02) | 0.701   |
| Risk ratio for a between any consecutive weeks during post COVID period | 1.11 (1.09-1.13)    | <0.001  | 1.01 (0.99-1.02)       | 0.46    | 1.02 (0.99-1.06)  | 0.2483  | 1.01 (0.98-1.04) | 0.415   |



**Supplementary table 7. Total number of observations and health worker's performance on a weekly basis**

| Week | Day     | Period    | Total observation (N) | hand washing practice (n, %) |       | Use of gloves and gown for child birth (n,%) |       | Preparation for essential equipment for childbirth(n,%) |       | Health worker greets mothers (n, %) |       | Companion during labour (n,%) |       | FHR monitoring every half an hour (n,%) |       | Cord clamping after 1min (n,%) |       | Newborn kept Skin to skin with mother (n,%) |       | Breast feeding within 1hour (n,%) |       |
|------|---------|-----------|-----------------------|------------------------------|-------|----------------------------------------------|-------|---------------------------------------------------------|-------|-------------------------------------|-------|-------------------------------|-------|-----------------------------------------|-------|--------------------------------|-------|---------------------------------------------|-------|-----------------------------------|-------|
|      |         |           |                       | n                            | %     | n                                            | %     | n                                                       | %     | n                                   | %     | n                             | %     | n                                       | %     | n                              | %     | n                                           | %     | n                                 | %     |
| 1    | 0-6     | Before LD | 885                   | 283                          | 32.0% | 844                                          | 95.4% | 665                                                     | 75.1% | 280                                 | 31.6% | 778                           | 87.9% | 422                                     | 47.7% | 505                            | 57.1% | 31                                          | 3.5%  | 229                               | 25.9% |
| 2    | 7-13    | Before LD | 703                   | 231                          | 32.9% | 668                                          | 95.0% | 529                                                     | 75.2% | 225                                 | 32.0% | 565                           | 80.4% | 363                                     | 51.6% | 456                            | 64.9% | 38                                          | 5.4%  | 178                               | 25.3% |
| 3    | 14-20   | Before LD | 679                   | 179                          | 26.4% | 654                                          | 96.3% | 531                                                     | 78.2% | 228                                 | 33.6% | 611                           | 90.0% | 349                                     | 51.4% | 415                            | 61.1% | 37                                          | 5.4%  | 207                               | 30.5% |
| 4    | 21-27   | Before LD | 801                   | 225                          | 28.1% | 752                                          | 93.9% | 619                                                     | 77.3% | 249                                 | 31.1% | 700                           | 87.4% | 409                                     | 51.1% | 522                            | 65.2% | 47                                          | 5.9%  | 365                               | 45.6% |
| 5    | 28-34   | Before LD | 718                   | 205                          | 28.6% | 678                                          | 94.4% | 621                                                     | 86.5% | 243                                 | 33.8% | 628                           | 87.5% | 379                                     | 52.8% | 442                            | 61.6% | 36                                          | 5.0%  | 360                               | 50.1% |
| 6    | 35-41   | Before LD | 679                   | 147                          | 21.6% | 646                                          | 95.1% | 542                                                     | 79.8% | 207                                 | 30.5% | 582                           | 85.7% | 348                                     | 51.3% | 428                            | 63.0% | 72                                          | 10.6% | 385                               | 56.7% |
| 7    | 42-48   | Before LD | 823                   | 233                          | 28.3% | 776                                          | 94.3% | 684                                                     | 83.1% | 262                                 | 31.8% | 726                           | 88.2% | 435                                     | 52.9% | 532                            | 64.6% | 82                                          | 10.0% | 432                               | 52.5% |
| 8    | 49-55   | Before LD | 621                   | 164                          | 26.4% | 595                                          | 95.8% | 513                                                     | 82.6% | 231                                 | 37.2% | 542                           | 87.3% | 339                                     | 54.6% | 423                            | 68.1% | 94                                          | 15.1% | 342                               | 55.1% |
| 9    | 56-62   | Before LD | 722                   | 221                          | 30.6% | 684                                          | 94.7% | 617                                                     | 85.5% | 264                                 | 36.6% | 644                           | 89.2% | 412                                     | 57.1% | 492                            | 68.1% | 157                                         | 21.7% | 439                               | 60.8% |
| 10   | 63-69   | Before LD | 620                   | 169                          | 27.3% | 592                                          | 95.5% | 519                                                     | 83.7% | 213                                 | 34.4% | 531                           | 85.6% | 343                                     | 55.3% | 406                            | 65.5% | 150                                         | 24.2% | 335                               | 54.0% |
| 11   | 70-76   | Before LD | 711                   | 217                          | 30.5% | 675                                          | 94.9% | 585                                                     | 82.3% | 260                                 | 36.6% | 603                           | 84.8% | 338                                     | 47.5% | 485                            | 68.2% | 186                                         | 26.2% | 409                               | 57.5% |
| 12.5 | 77-83   | Before LD | 266                   | 76                           | 28.6% | 254                                          | 95.5% | 221                                                     | 83.1% | 86                                  | 32.3% | 223                           | 83.8% | 132                                     | 49.6% | 185                            | 69.5% | 75                                          | 28.2% | 137                               | 51.5% |
| 12.5 | 84-90   | During LD | 219                   | 80                           | 36.5% | 205                                          | 93.6% | 173                                                     | 79.0% | 64                                  | 29.2% | 184                           | 84.0% | 94                                      | 42.9% | 159                            | 72.6% | 64                                          | 29.2% | 89                                | 40.6% |
| 13   | 91-97   | During LD | 51                    | 15                           | 29.4% | 49                                           | 96.1% | 45                                                      | 88.2% | 22                                  | 43.1% | 43                            | 84.3% | 13                                      | 25.5% | 33                             | 64.7% | 10                                          | 19.6% | 16                                | 31.4% |
| 14   | 98-104  | During LD | 131                   | 41                           | 31.3% | 118                                          | 90.1% | 101                                                     | 77.1% | 31                                  | 23.7% | 113                           | 86.3% | 29                                      | 22.1% | 77                             | 58.8% | 30                                          | 22.9% | 30                                | 22.9% |
| 15   | 105-111 | During LD | 155                   | 69                           | 44.5% | 146                                          | 94.2% | 128                                                     | 82.6% | 39                                  | 25.2% | 118                           | 76.1% | 56                                      | 36.1% | 96                             | 61.9% | 43                                          | 27.7% | 44                                | 28.4% |
| 16   | 112-118 | During LD | 179                   | 78                           | 43.6% | 168                                          | 93.9% | 135                                                     | 75.4% | 48                                  | 26.8% | 148                           | 82.7% | 77                                      | 43.0% | 110                            | 61.5% | 35                                          | 19.6% | 39                                | 21.8% |
| 17   | 119-125 | During LD | 250                   | 95                           | 38.0% | 230                                          | 92.0% | 199                                                     | 79.6% | 75                                  | 30.0% | 193                           | 77.2% | 114                                     | 45.6% | 151                            | 60.4% | 60                                          | 24.0% | 84                                | 33.6% |
| 18   | 126-132 | During LD | 254                   | 101                          | 39.8% | 234                                          | 92.1% | 207                                                     | 81.5% | 76                                  | 29.9% | 212                           | 83.5% | 135                                     | 53.1% | 155                            | 61.0% | 65                                          | 25.6% | 76                                | 29.9% |
| 19   | 133-139 | During LD | 316                   | 121                          | 38.3% | 282                                          | 89.2% | 253                                                     | 80.1% | 108                                 | 34.2% | 264                           | 83.5% | 136                                     | 43.0% | 189                            | 59.8% | 74                                          | 23.4% | 147                               | 46.5% |
| 20   | 140-146 | During LD | 289                   | 133                          | 46.0% | 268                                          | 92.7% | 248                                                     | 85.8% | 94                                  | 32.5% | 247                           | 85.5% | 134                                     | 46.4% | 146                            | 50.5% | 44                                          | 15.2% | 142                               | 49.1% |
| 21   | 147-153 | During LD | 253                   | 122                          | 48.2% | 238                                          | 94.1% | 220                                                     | 87.0% | 84                                  | 33.2% | 197                           | 77.9% | 134                                     | 53.0% | 125                            | 49.4% | 54                                          | 21.3% | 134                               | 53.0% |

**Supplementary Table 8. Weekly birth rate in 9 hospitals January-May 2019 and January-May 2020**

| Week | Day     | 2019 (January-May) | 2020 (January-May) |
|------|---------|--------------------|--------------------|
| 1    | 0-6     | 1207               | 1330               |
| 2    | 7-13    | 1281               | 1187               |
| 3    | 14-20   | 1347               | 1134               |
| 4    | 21-27   | 1111               | 1221               |
| 5    | 28-34   | 1202               | 1181               |
| 6    | 35-41   | 1203               | 1061               |
| 7    | 42-48   | 1141               | 1179               |
| 8    | 49-55   | 1129               | 1027               |
| 9    | 56-62   | 914                | 1145               |
| 10   | 63-69   | 1145               | 972                |
| 11   | 70-76   | 1196               | 1176               |
| 12   | 77-83   | 1161               | 996                |
| 13   | 91-97   | 1147               | 673                |
| 14   | 98-104  | 1159               | 806                |
| 15   | 105-111 | 1106               | 700                |
| 16   | 112-118 | 1057               | 670                |
| 17   | 119-125 | 1137               | 789                |
| 18   | 126-132 | 1002               | 789                |
| 19   | 133-139 | 981                | 732                |
| 20   | 140-146 | 1101               | 685                |
| 21   | 147-153 | 1028               | 633                |

**Supplementary Table 9. The hospital-wise random intercept for caesarean birth, preterm birth, institutional stillbirth and neonatal mortality**

| Hospital                  | Caesarean birth | Pre-term birth | Institutional stillbirth | Institutional neonatal mortality |
|---------------------------|-----------------|----------------|--------------------------|----------------------------------|
| 1                         | -3.831          | -3.111         | -5.964                   | -8.552                           |
| 2                         | -2.661          | -2.834         | -5.925                   | -8.924                           |
| 3                         | -3.625          | -2.757         | -6.393                   | -9.163                           |
| 4                         | -3.183          | -3.054         | -5.836                   | -9.205                           |
| 5                         | -3.500          | -3.308         | -6.491                   | -9.164                           |
| 6                         | -2.377          | -3.311         | -6.343                   | -8.572                           |
| 7                         | -3.103          | -2.323         | -6.479                   | -9.210                           |
| 8                         | -2.702          | -2.473         | -6.237                   | -8.958                           |
| 9                         | -3.143          | -3.167         | -6.135                   | -8.862                           |
| <b>Standard deviation</b> | <b>0.481</b>    | <b>0.355</b>   | <b>0.247</b>             | <b>0.258</b>                     |

Supplementary figure 1. Map of Nepal and location of hospitals

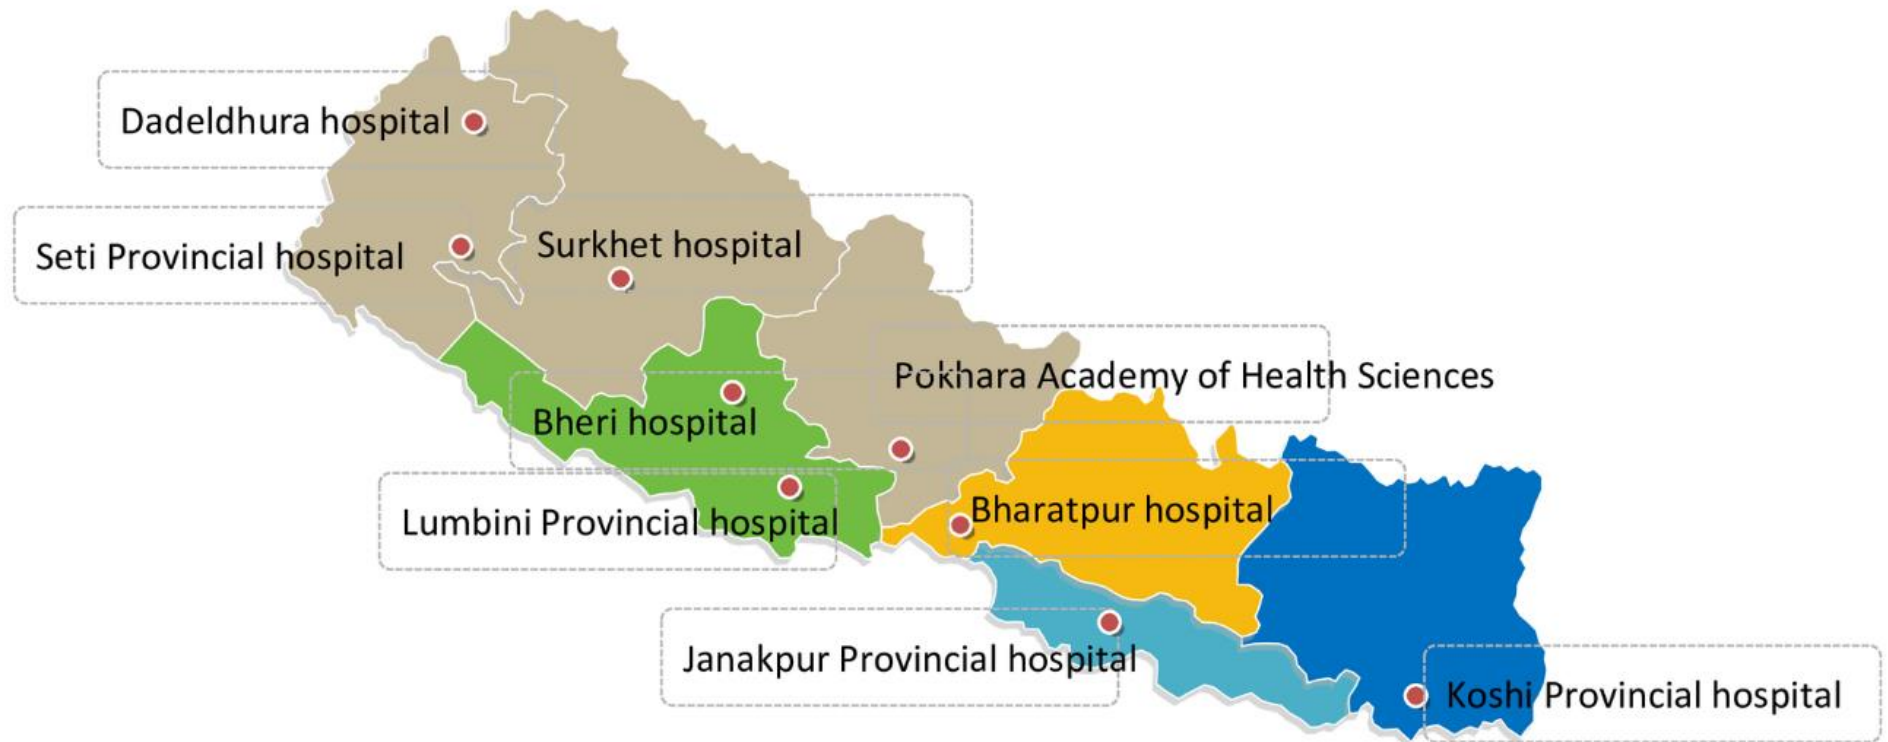

Supplementary figure 2. Participant flow figure

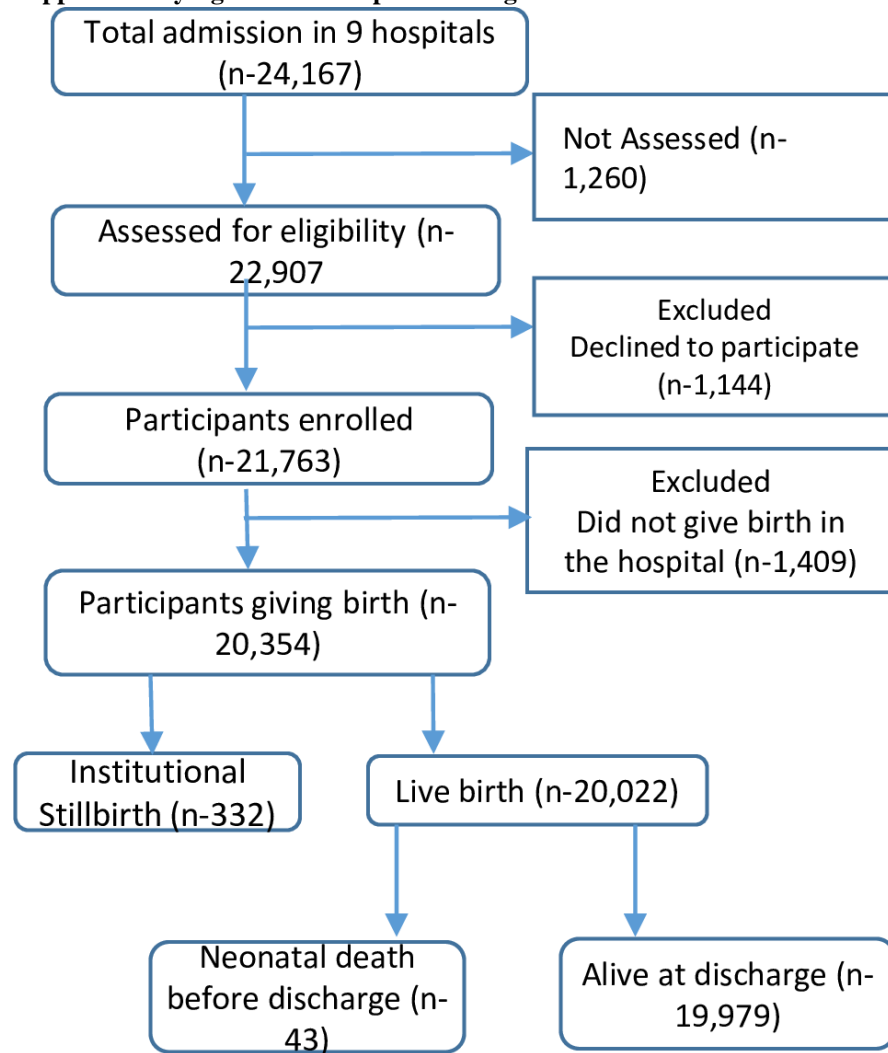

Supplementary figure 3. Weekly change in preterm birth rate before and during COVID-19 LD

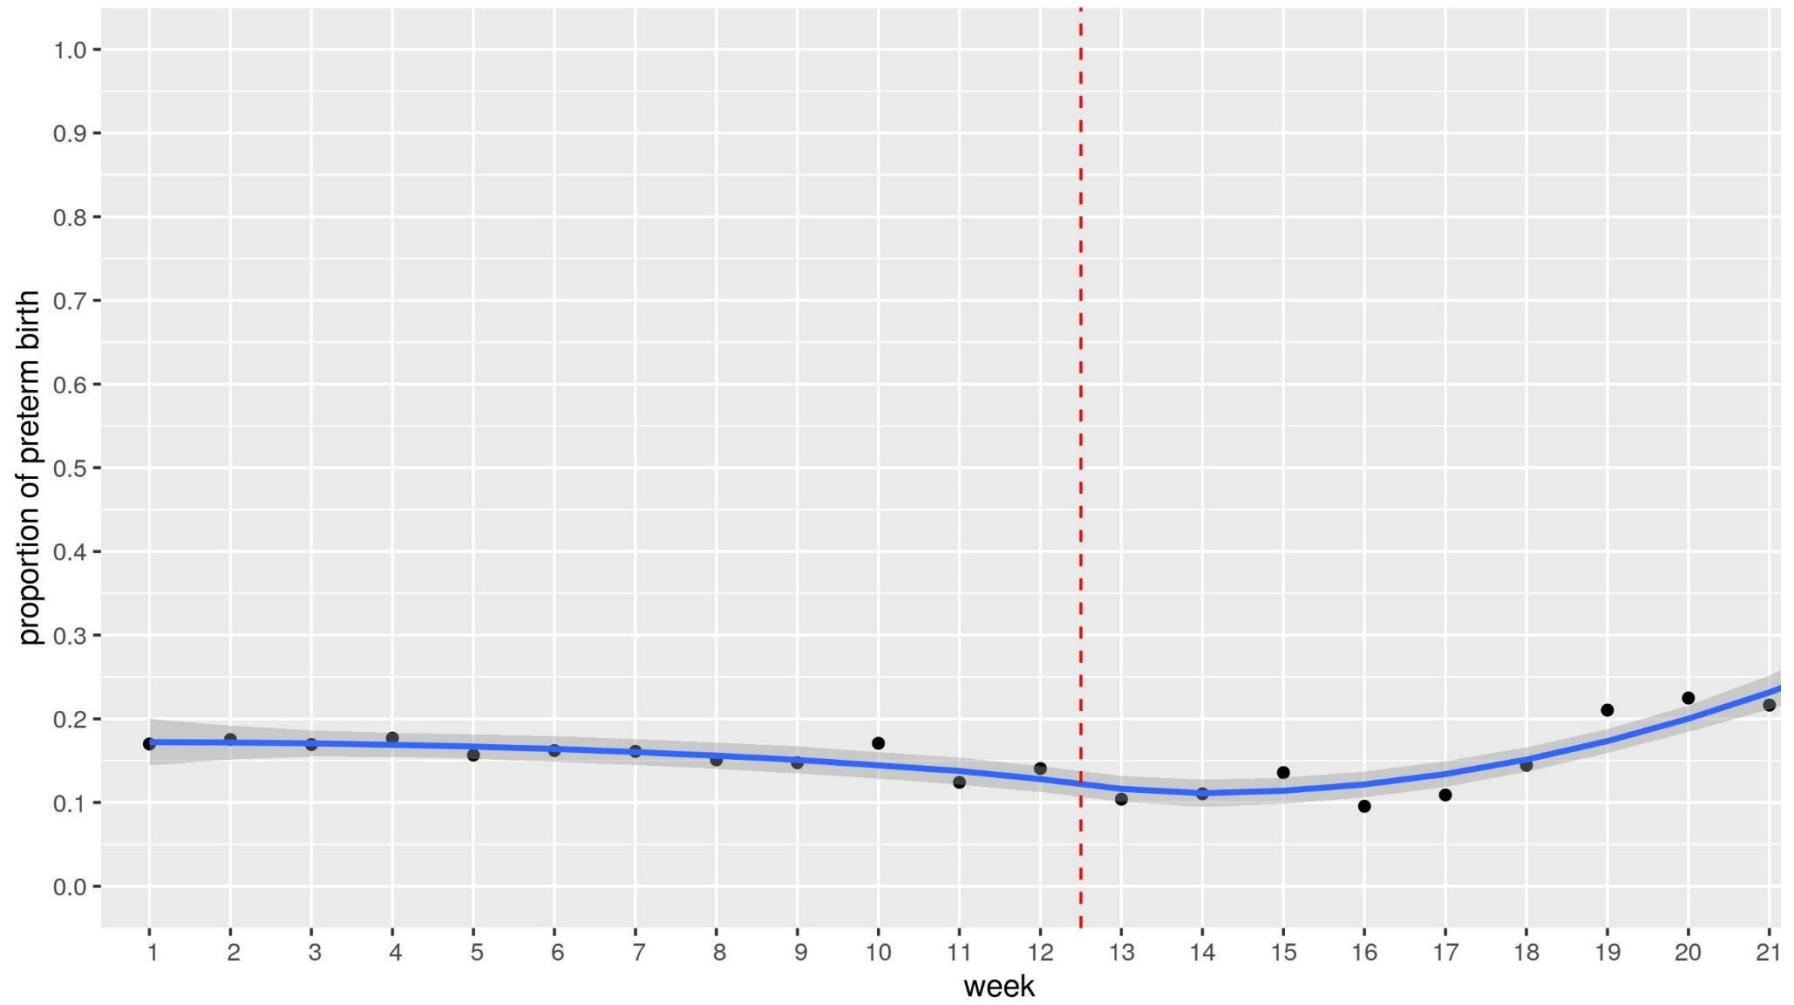

Supplementary 4. Weekly change in the institutional stillbirth rate before and during COVID-19 LD

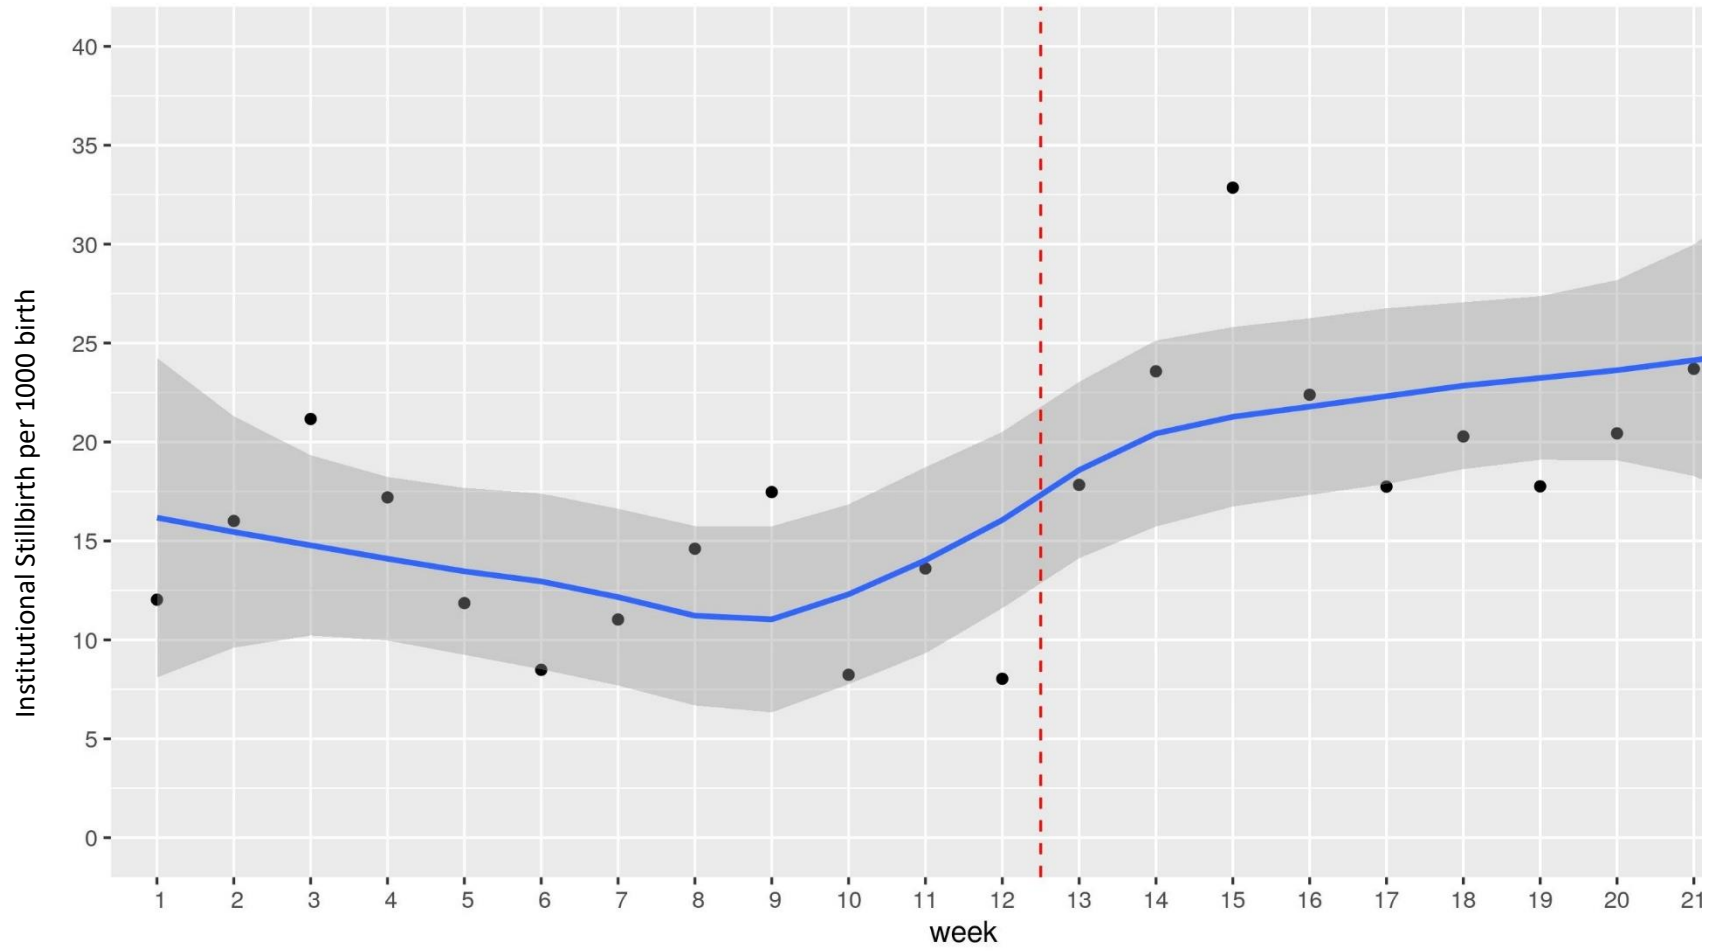

Supplementary figure 5. Weekly change in the institutional neonatal mortality rate before and after COVID-19 LD

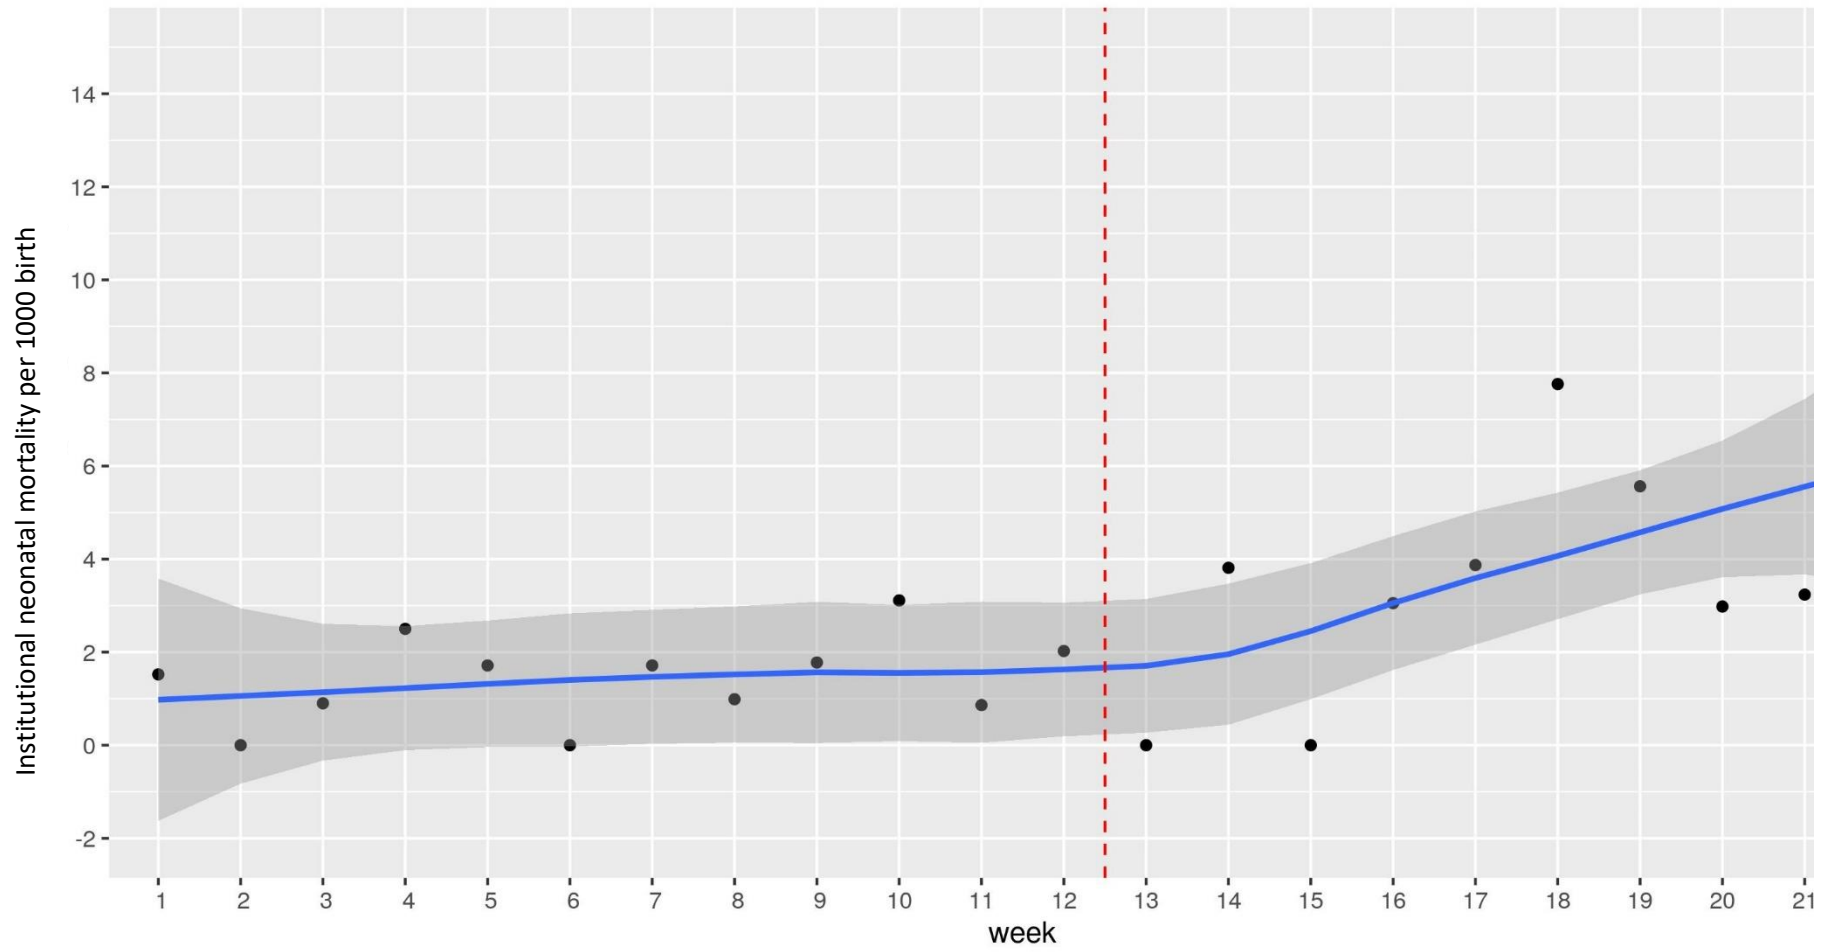



Supplementary figure 6a. Health worker's infection prevention practice, preparation of equipment during childbirth, and changes after Nepal national lockdown (red dotted line)

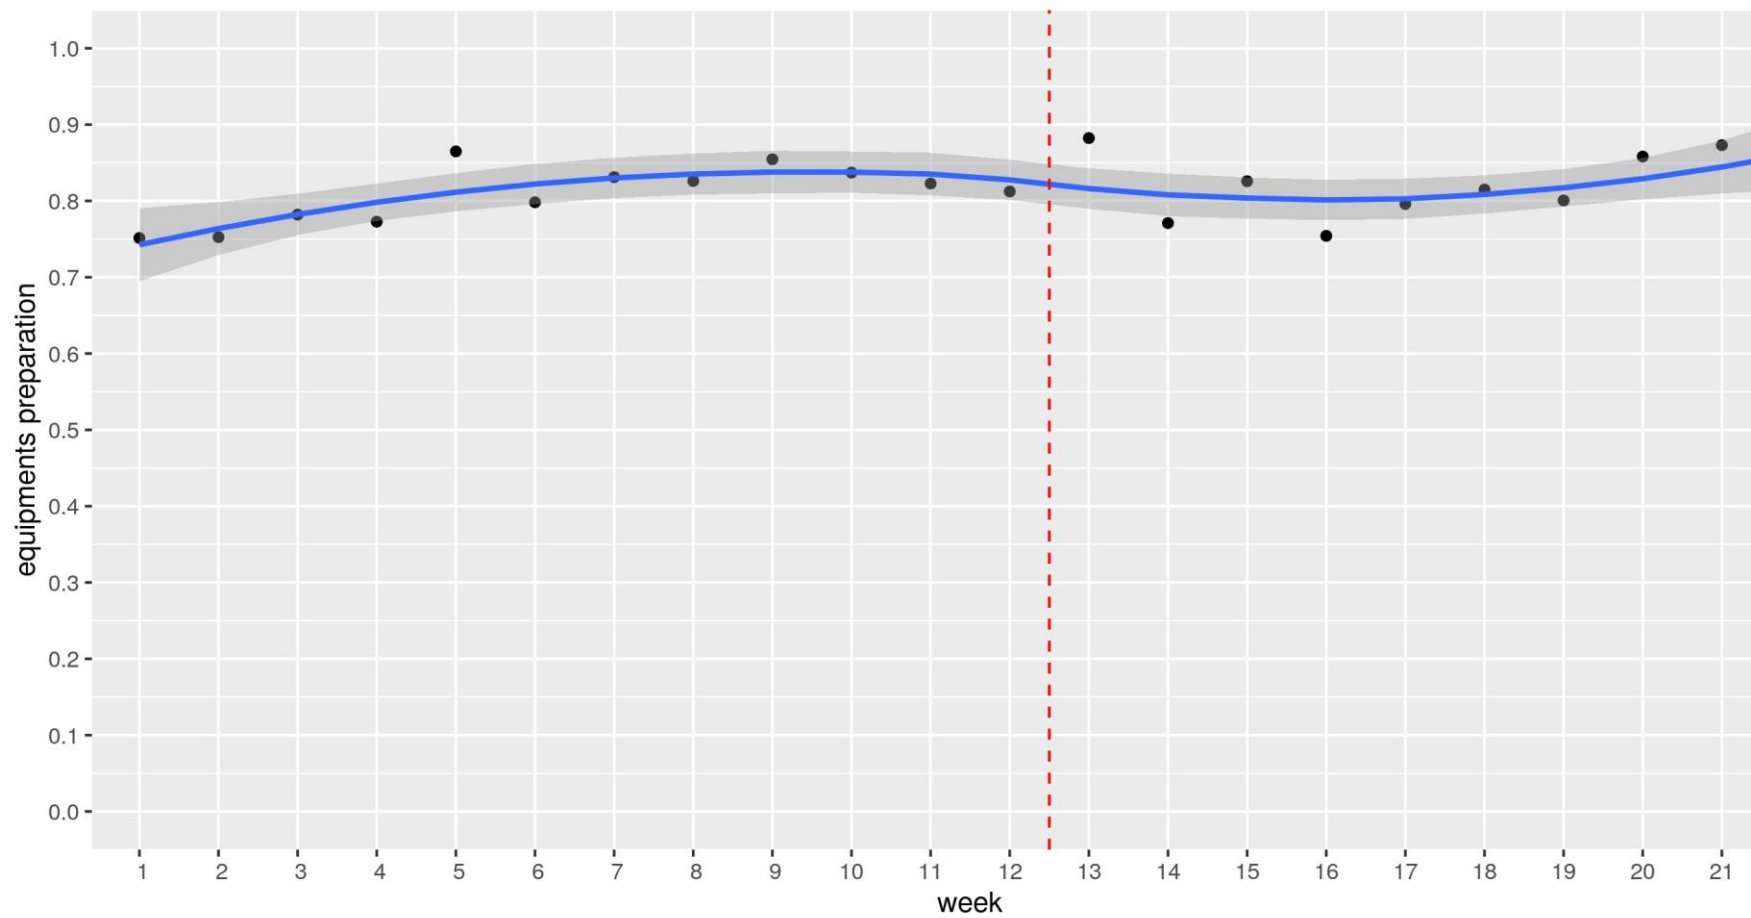

Supplementary figure 6b. Health worker's infection prevention practice, hand washing as per WHO standard, and changes after Nepal national lockdown (red dotted line)

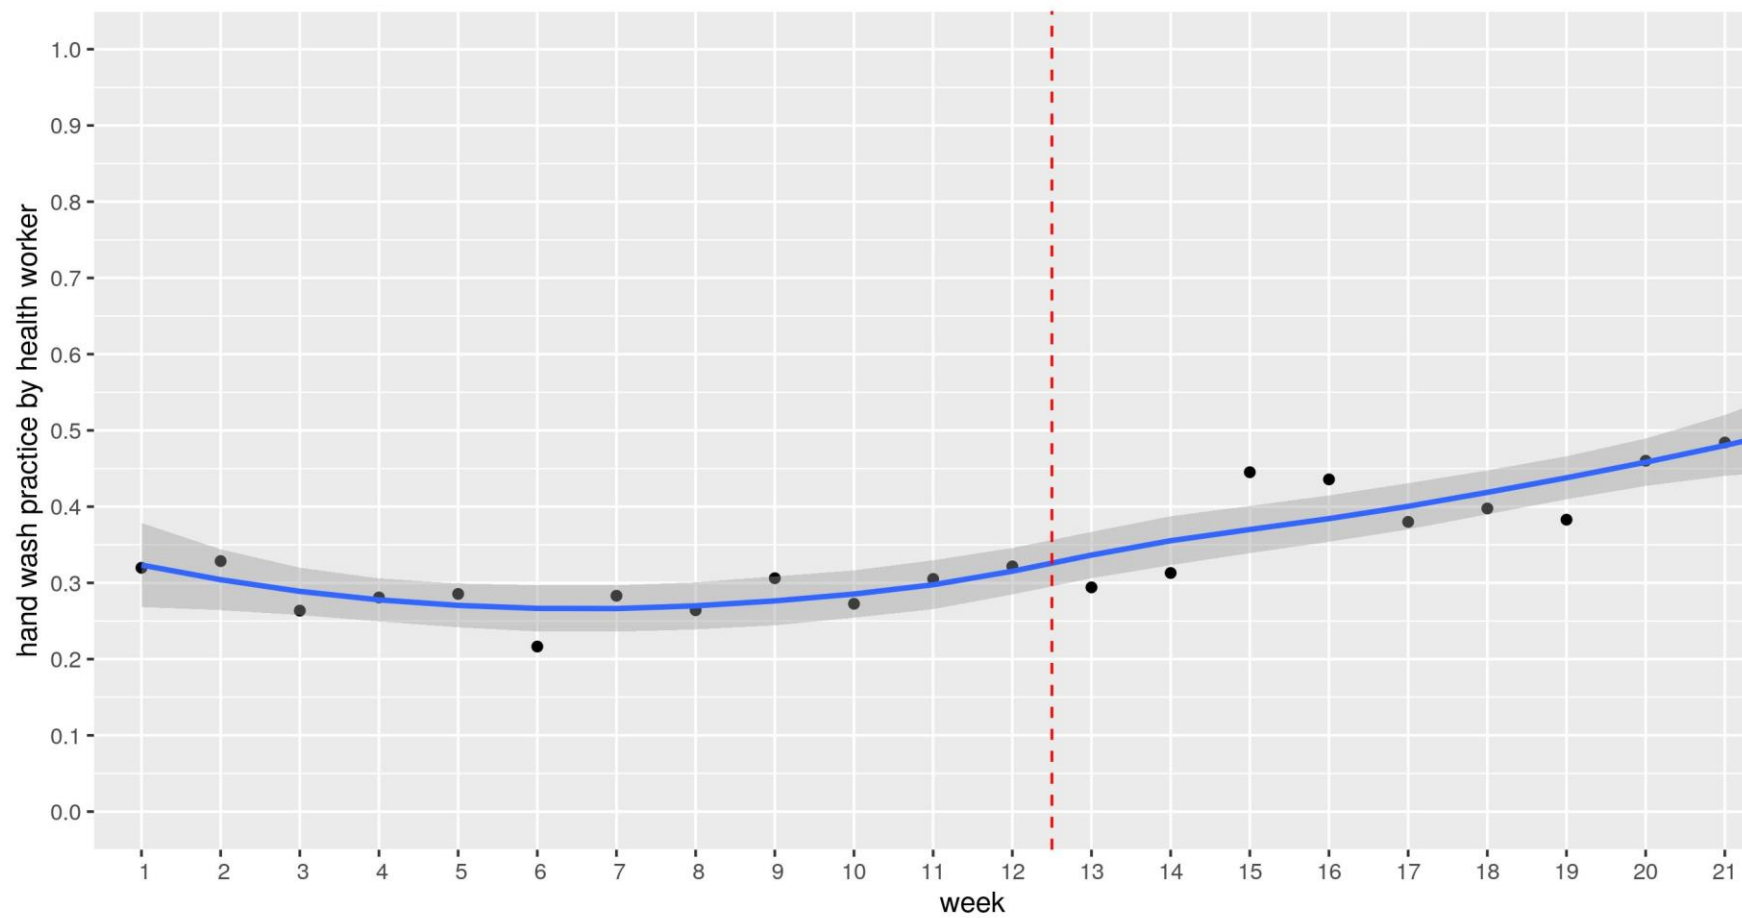

Supplementary figure 6c. Health worker's infection prevention practice, use of gown and gloves during childbirth, and changes after Nepal national lockdown (red dotted line)

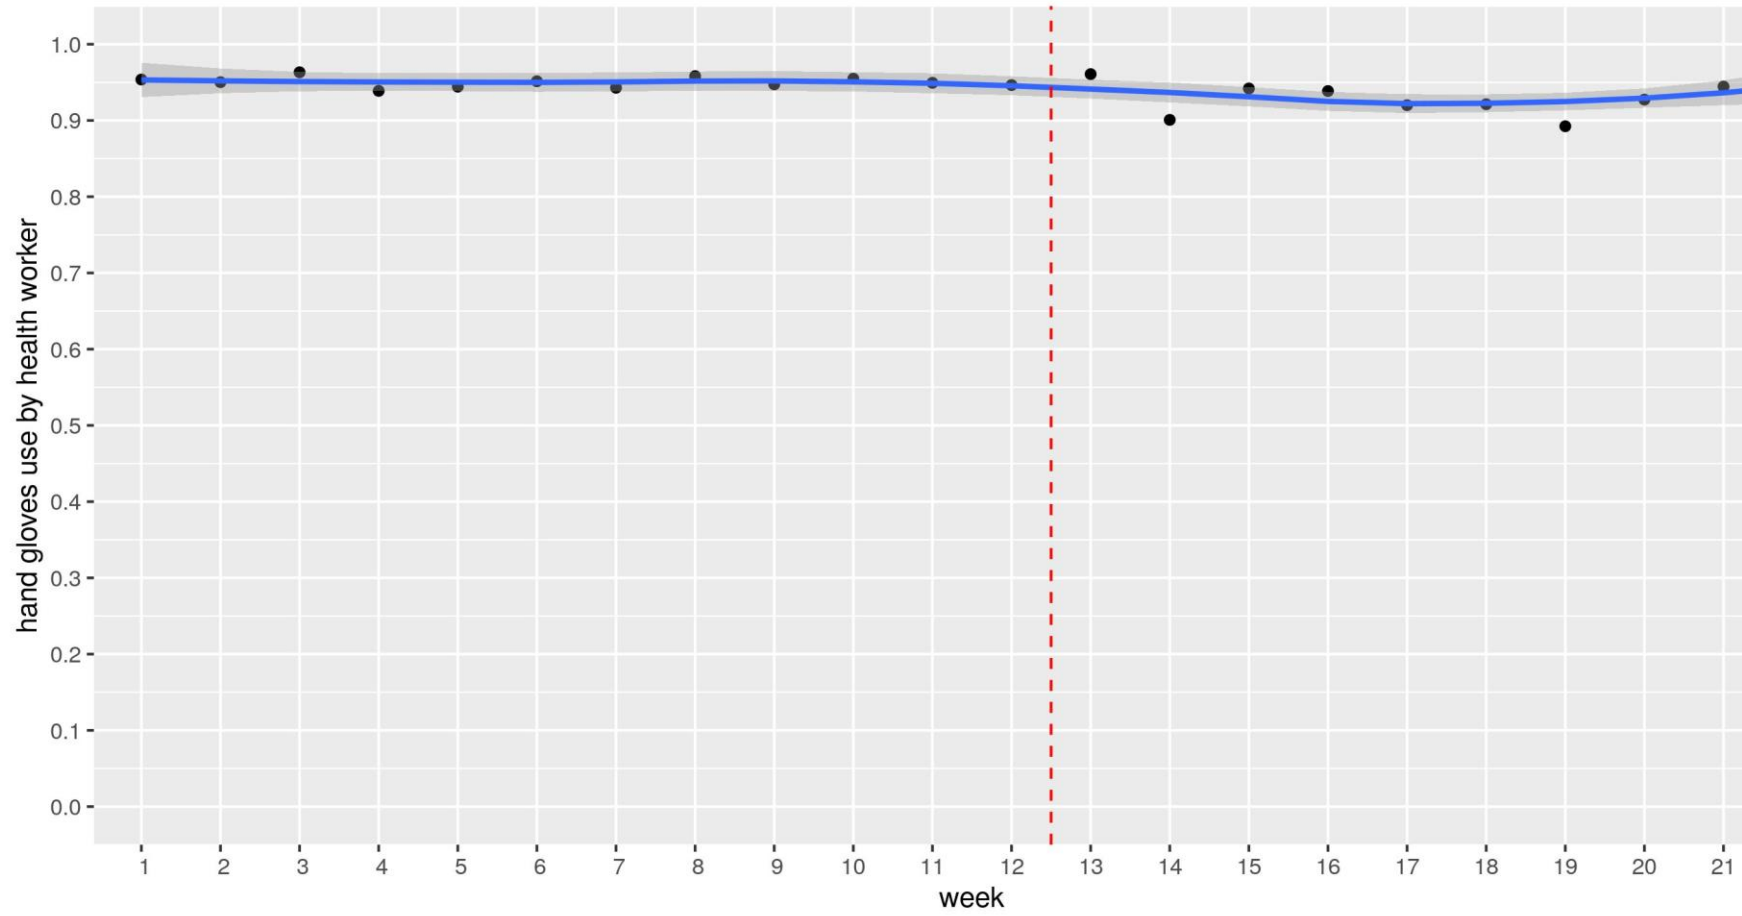

Supplement: mmc3.pdf [file mmc3.pdf]
