# Supplementary material
Source: PubMed Central journal article supplement (PMC7417164)
Supplement: mmc1.pdf [file mmc1.pdf]

# THE LANCET

## Global Health

### Supplementary appendix 1

This translation in Nepali was submitted by the authors and we reproduce it as supplied. It has not been peer reviewed. *The Lancet's* editorial processes have only been applied to the original in English, which should serve as reference for this manuscript.

यो नेपाली अनुवाद लेखकहरूले नै उपलब्ध गराउनुभएको हो र हामीले उपलब्ध भए अनुसार नै प्रकाशित गरेका हौं । यो अनुवादको 'पीयर रिभ्यू' भएको छैन । अंग्रेजी भाषामा उपलब्ध लेखमा मात्रै 'द लान्सेट'को सम्पादकीय प्रक्रिया अवलम्बन गरिएको छ । तसर्थ यस अनुवादका लागि पनि उक्त अंग्रेजी लेखलाई नै आधार मान्नुपर्ने छ ।

Supplement to: KC A, Gurung R, Kinney MV, et al. Effect of the COVID-19 pandemic response on intrapartum care, stillbirth, and neonatal mortality outcomes in Nepal: a prospective observational study. *Lancet Glob Health* 2020; published online Aug 10. [http://dx.doi.org/10.1016/S2214-109X\(20\)30345-4](http://dx.doi.org/10.1016/S2214-109X(20)30345-4).

## Summary in Nepali language

### पृष्ठभूमि

कोभिड-१९ महामारीको रोकथामका लागि गरिएका प्रयासहरूले संसारभर नै मातृ तथा नवजात शिशु स्वास्थ्य सेवाहरूलाई प्रभावित गरिरहेका छन् । यो अध्ययनले नेपालमा राष्ट्रियस्तरमा कोभिड-१९ लकडाउन हुनुभन्दा पहिलेको र भईरहेको समयमा आएका परिणामहरू (स्वास्थ्यसंस्थामा हुने मृतजन्म र नवजात शिशु मृत्युदर), स्वास्थ्यसंस्थामा हुने जन्मदर र प्रसूती स्याहारको गुणस्तरको मूल्यांकन गरेको छ ।

### विधि

यो अध्ययन ९ वटा अस्पतालहरूमा ५ महिना (१ जनवरी - ३० मे २०२०) को अवधिसम्म SUSTAIN र REFINE अध्ययनमा सहभागी हुन मन्जुर महिलाहरूलाई समावेश गरिएको थियो । यो अध्ययनमा लकडाउन सुरु हुनुभन्दा १२.५ हप्ता अघिको र लकडाउन अवधिको ९.५ हप्ताको समयलाई समावेश गरिएको छ । जनसाङ्ख्यिक र प्रसूति विशेषताहरूको जानकारी विवरण केस नोट मार्फत संकलन गरिएको थियो र स्वास्थ्यकर्मीको कार्य-क्षमता अवलोकन मार्फत संकलन गरिएको थियो । रिग्रेसन एनलाईसीस् प्रयोग गरि स्वास्थ्य संस्थामा हुने जन्म, हेरचाहको गुणस्तर र मृत्युदरमा आएका परिवर्तनहरूको मूल्यांकन गरिएको थियो ।

### परिणाम

यस अध्ययनमा कुल २२,९०७ मध्ये २१,७६३ महिलाहरूलाई समावेश गरिएको थियो र १०,४५३ जन्म अवलोकन गरिएको थियो । लकडाउनको समयमा स्वास्थ्यसंस्थामा हुने जन्म ५२.५% ले कम भयो । स्वास्थ्यसंस्थामा हुने मृत शिशु दर १४ प्रति हजार १,००० बाट बढेर २१ प्रति १००० कुल जन्म (पी-मान <०.०००१), र नवजात शिशु मृत्यु दर १३ प्रति १००० बाट बढेर ४० प्रति १००० जीवित जन्म (पी-मान <०.००२२) पुग्यो । स्याहारको गुणस्तरको सम्बन्धमा, भ्रुणको मुटुको चाल मापन गर्न गरिने जाँच १३.४% ले घट्यो (-१५.४ देखि -११.३, पी-मान <०.००१) ले घट्यो, र १ घण्टा भित्र गर्नुपर्ने स्तनपानमा ३.५% (-४.३ देखि -२.६, पी-मान ०.००३२) ले घट्यो । लकडाउनको समयमा नवजात शिशुको जन्म पश्चात छाला देखि देखि छालासम्मको सम्पर्क १३.२% ( १२.१ देखि १४.५, पी-मान <०.०००१) ले बढ्यो, र प्रसूती गराउँदा स्वास्थ्यकर्मीहरूको हात स्वच्छ राख्ने अभ्यास १२.९% (११.८ देखि १३.९, पी-मान <०.०००१) ले बढ्यो ।

### विस्लेषण

लकडाउनको समयमा स्वास्थ्यसंस्थामा हुने जन्म लगभग आधाले घट्यो, र संगसंगै स्वास्थ्यसंस्थामा हुने मृतशिशु दर र नवजात शिशु मृत्युदरमा वृद्धि भयो, र स्याहारको गुणस्तर घट्न पुग्यो, विशेषगरी प्रसूती अगाडि गरिने भ्रुणको मुटुको चालको जाँच, र शिशु जन्मिएको १ घण्टा भित्र गर्नुपर्ने स्तनपानमा गिरावट आयो । विशेषगरी हात हात स्वच्छ राख्ने अभ्यासमा र शिशुलाई आमासँग छालादेखि छालासम्मको सम्पर्कमा राख्ने व्यवहारहरूमा सुधार भयो । तत्काल उच्च गुणस्तरको प्रसूती स्याहार प्राप्त गर्ने पहुँच संरक्षण गर्न र जोखिममा रहेका स्वास्थ्य प्रणाली प्रयोगकर्ताहरूको उच्च मृत्युदर घटाउन अति आवश्यक छ ।

**कोष-** ग्रान्ड च्यालेन्जेस क्यान्डाको सहयोग
