# Supplementary material
Source: PubMed Central journal article supplement (PMC7417164)
Supplement: mmc2.pdf [file mmc2.pdf]

# THE LANCET

## Global Health

### Supplementary appendix 2

This translation in Mathali was submitted by the authors and we reproduce it as supplied. It has not been peer reviewed. *The Lancet's* editorial processes have only been applied to the original in English, which should serve as reference for this manuscript.

मैथिलीके ई अनुवाद लेखकसबद्वारा पठैल गेल बमोजिम तयार पारल गेल अछी। समान पदस्थ व्यक्तिस ई समिक्षा नै भेल अछी। लान्सेटके सम्पादन प्रक्रिया अंग्रेजी भाषाके लेल मात्र लागु अछी, जे ई पाण्डुलिपिके सन्दर्भसामग्री अछी।

Supplement to: KC A, Gurung R, Kinney MV, et al. Effect of the COVID-19 pandemic response on intrapartum care, stillbirth, and neonatal mortality outcomes in Nepal: a prospective observational study. *Lancet Glob Health* 2020; published online Aug 10. [http://dx.doi.org/10.1016/S2214-109X\(20\)30345-4](http://dx.doi.org/10.1016/S2214-109X(20)30345-4).

## Summary in Maithali language

### सारांश

#### पृष्ठभूमि

कोभिड-१९ महामारीके नियन्त्रण प्रक्रिया स संसारभरके मातृ आ नवजात बच्चाके स्वास्थ्य सेवा प्रभावित भरहल अछी। नेपालमे भेल राष्ट्रिय स्तरपर लकडाउनके समयमे आ ओइ सँ पहिलेके समयमे भेल अन्तिम परिणामसब (स्वास्थ्य संस्थामे भेल मृत जन्म आ नवजात बच्चाके मृत्यु दर), स्वास्थ्य संस्थामे भेल जन्मक दर आ बच्चा जन्माबक समयमे भेल स्याहारके गुणस्तरके मूल्यांकन ई अध्ययनमे कैल गेल अछी।

#### विधि

नेपालके ९ टा अस्पतालमे एक अवलोकनिय अध्ययन पुरा ५ महिना (१ जनवरी - ३० मे २०२०) SUSTAIN / REFINE अध्ययन के लेल जे महिला सहभागी होब के लेल मन्जुरी देलक सबके सामेल कैल गेलै। लकडाउन स १२ हप्ता पहिले आ लकडाउन समयके ९.५ हप्ता तक कैल गेलै। डेमोग्राफिक आ प्रसूति सम्बन्धि जानकारी केस नोट स निकालक, आ स्वास्थ्यकर्मीके कार्यसम्पादनके जानकारी अवलोकनद्वारा संकलन कैल गेलै। स्वास्थ्य संस्थाके जन्मक दर, स्याहारके गुणस्तर आ मृत्युदरमे भेल परिवर्तन सबक मूल्यांकनके लेल रिगेशन एनालैसिसके प्रयोग भेलै।

#### परिणाम

जम्मा २२,९०७ मध्ये, २१,७६३ महिला सामेल भेलै आ १०,४५३ जन्मक अवलोकन कैल गेलै । लकडाउन समयमे, स्वास्थ्य संस्थाके जन्मक दर ५२.५% सँ घैट गेलै। स्वास्थ्य संस्थामे भेल मृत जन्मक दर १४ सँ बढ्क २१ प्रति १,००० जन्म भगेलै (पी-मान <०.०००१), आ नवजात बच्चाक मृत्यु दर १३ सँ बढ्क ४० प्रति १००० जीवित जन्म भगेलै (पी-मान <०.००२२)। स्याहारके गुणस्तर सन्दर्भमे भ्रुणक धड्कनके दर अनुगमन १३.४% सँ घैटक भगेलै (-१५.४ सँ -११.३, पी-मान <०.०००१) सँ घैटक भगेलै, आ जन्मक १ घण्टा भितर स्तनपानमे ३.५% (-४.३ सँ -२.६, पी-मान <०.००३२) सँ घैट गेलै। नवजात बच्चाके तुरुन्त स्याहारक लेल देह सँ देह मे जोडक राख के अभ्यासमे १३.२% (१२.१ सँ १४.५, पी-मान <०.०००१) मे वृद्धि भेलै आ जन्मक समयमे स्वास्थ्यकर्मीके हात स्वच्छता अभ्यास १२.९% (११.८ सँ १३.९, पी-मान <०.०००१) सँ बढ्क लकडाउनमे।

#### विश्लेषण

लकडाउनके समयमे स्वास्थ्य संस्थाके जन्मक दर आधा घैट गेलै, साथे स्वास्थ्य संस्थामे भेल मृत जन्मक दर आ नवजात बच्चाक मृत्यु दर बढ गेलै, आ स्याहारके गुणस्तर घैट गेलै, विशेषतः भ्रुणक धड्कनके दर अनुगमन, आ जन्मक १ घण्टा भितर स्तनपानमे । ब्यवहारमे सुधार भेलै, विशेषतः जन्मक समयमे स्वास्थ्यकर्मीके हात स्वच्छता अभ्यास आ नवजात बच्चाके तुरुन्त स्याहारक लेल देह सँ देह मे जोडक राख के अभ्यासमे। बच्चा जन्माबक समयमे उच्च गुणस्तरके स्याहार पहुँचाबक लेल आ एहन कमजोर स्वास्थ्य प्रणालीके प्रयोग सँ बृहत मृत्यु होब सँ बचाबक लेल अखन एकदम जरूरी अछी।

कोष- ग्रान्ड च्यालेन्जेस क्यानडाके सहयोग
